# Supplementary material for: Evaluating the strength of the land–atmosphere moisture feedback in earth system models using satellite observation
Source: Copernicus journal article supplement (doi:10.5194/hess-2016-206), 2016-05-17
Supplement: Supplementary file 1 [file hess-2016-206-supplement.pdf]

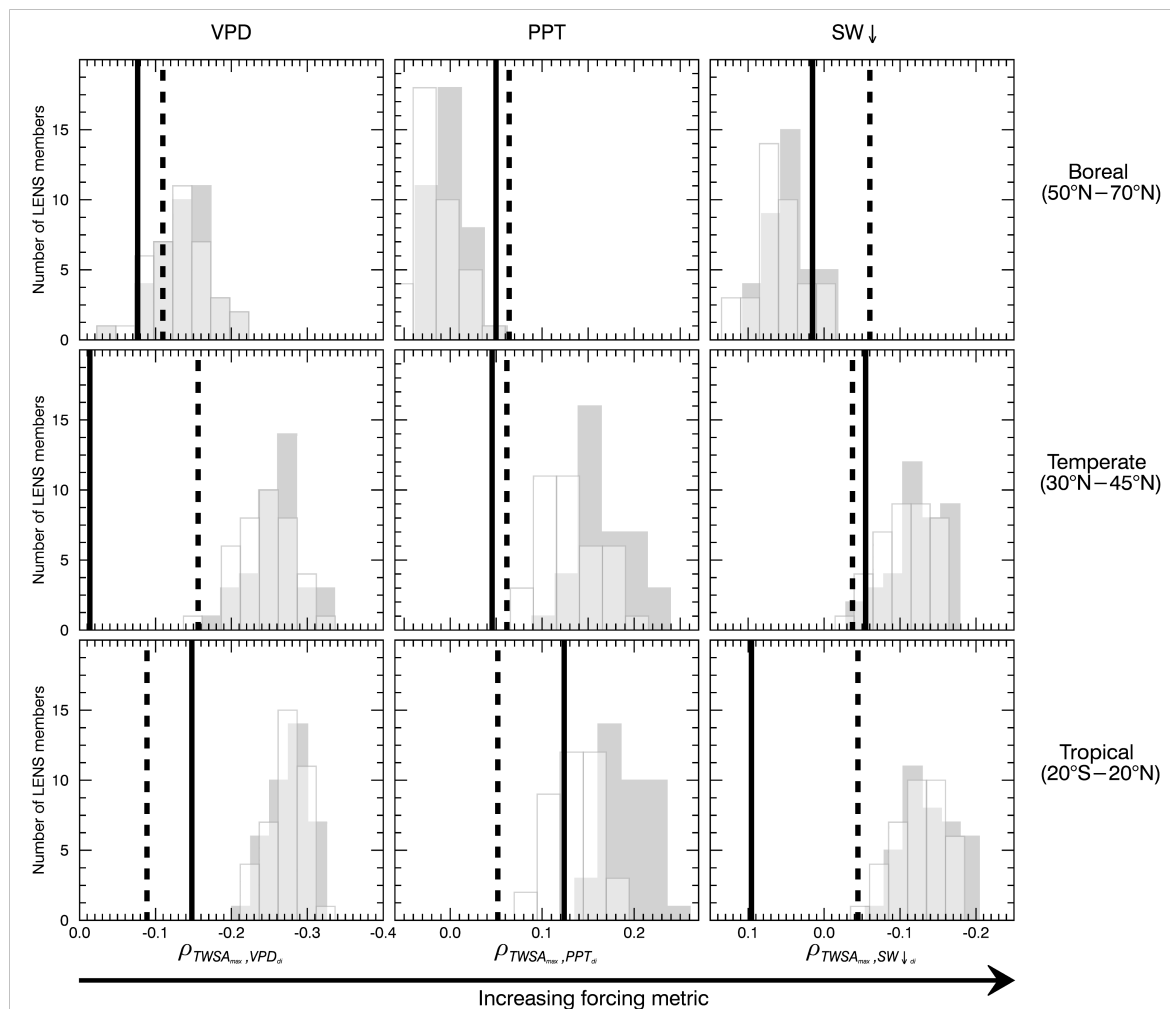

**Figure S1:** Ensemble histogram of forcing metrics from LENS with explicit TWS (grey bars) and accumulating residuals of the water balance (white bars) with the satellite observations from GRACE/AIRS/GPCP/CERES (solid black line) and the alternate observations from GRACE and ERA-Interim (dashed black line), averaged across land regions within different latitude bands.

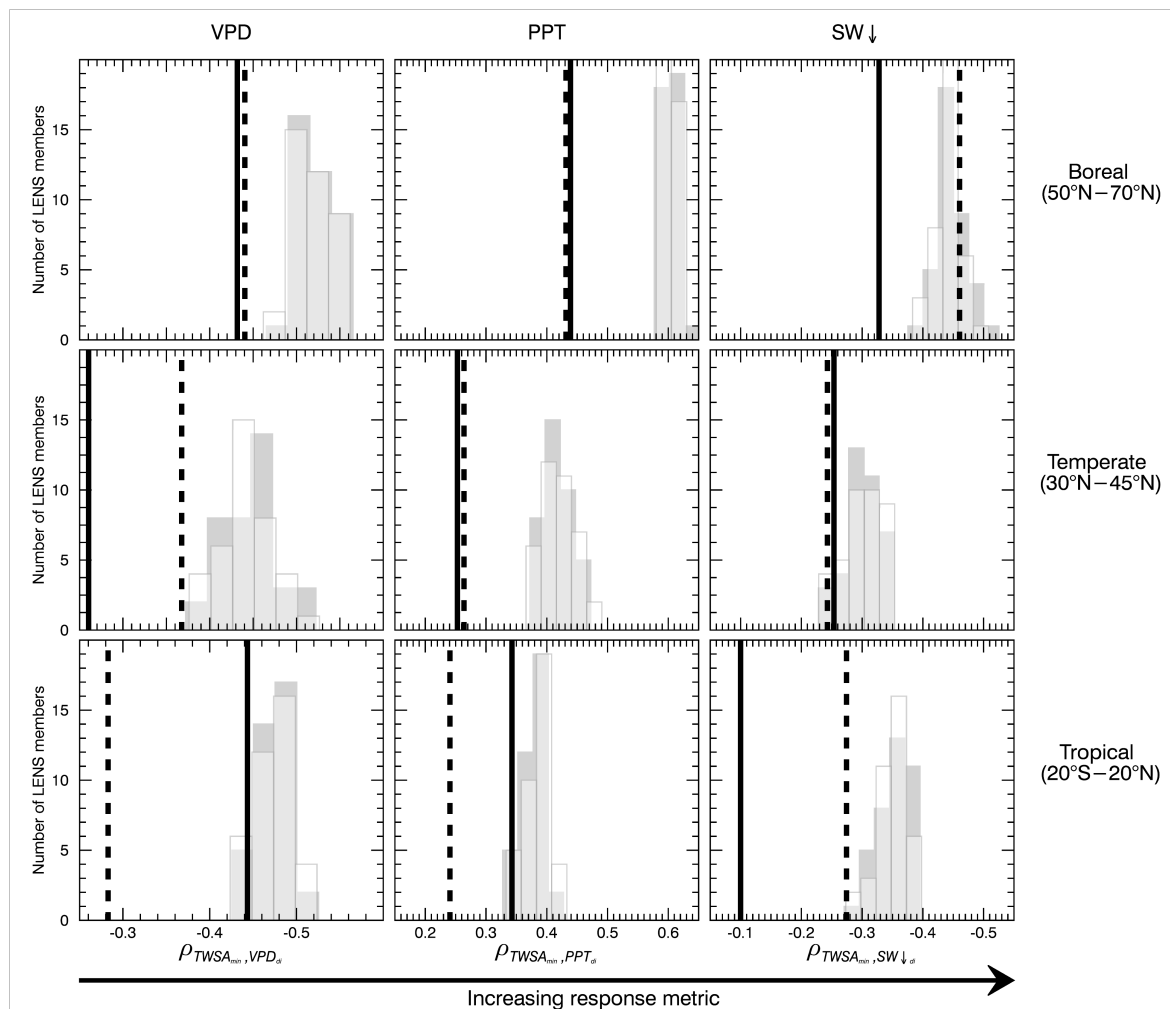

**Figure S2:** Ensemble histogram of response metrics from LENS with explicit TWS (grey bars) and accumulating residuals of the water balance (white bars) with the satellite observations from GRACE/AIRS/GPCP/CERES (solid black line) and the alternate observations from GRACE and ERA-Interim (dashed black line), averaged across land regions within different latitude bands.

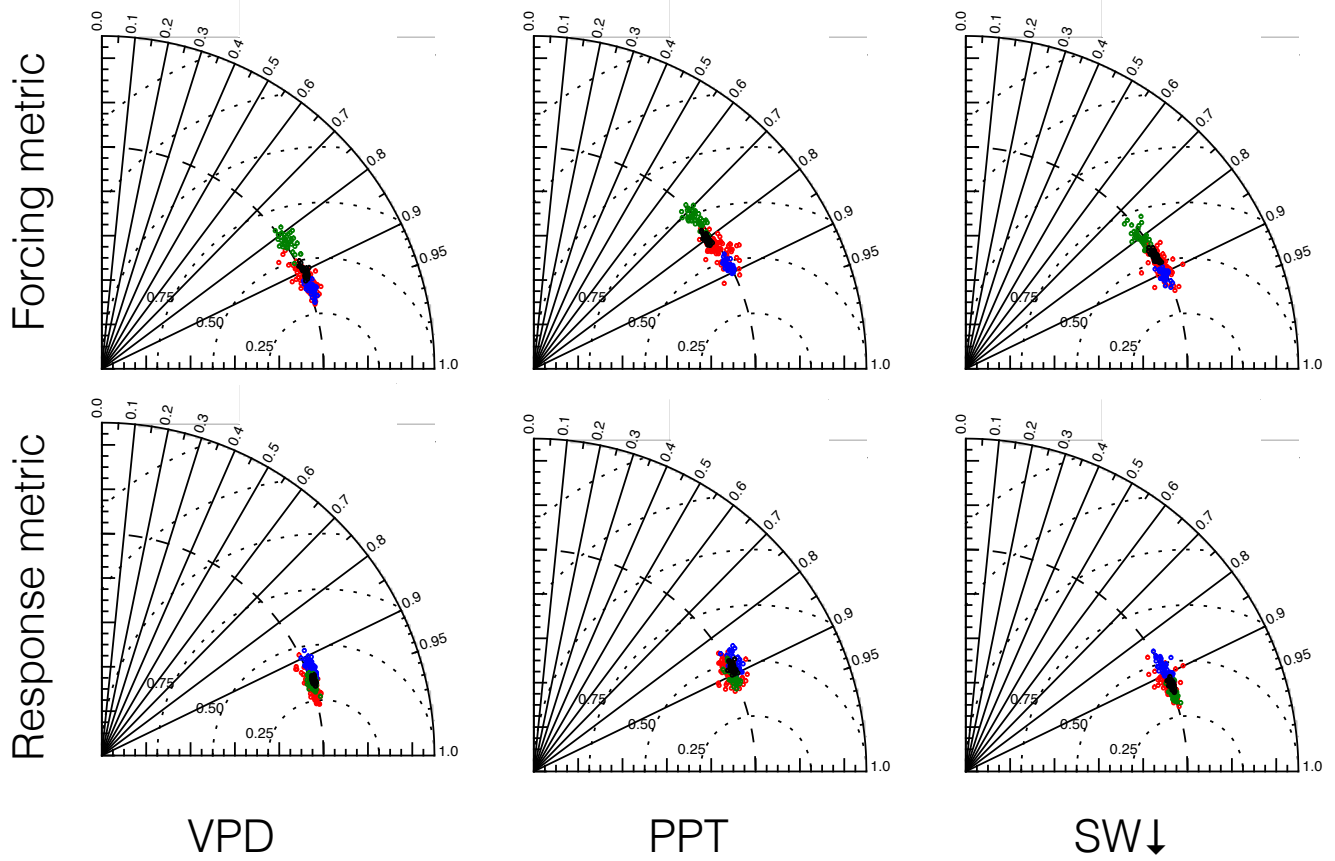

• Global    • 50°N – 70°N    • 30°N – 45°N, 30°S – 45°S    • 15°S – 15°N

**Figure S3:** Comparison of explicit total water storage output with the accumulated residuals of precipitation, evapotranspiration, and total runoff (surface and subsurface) for LENS.
